# Supplementary material
Source: PubMed Central journal article supplement (PMC3689993)
Supplement: supp_M112.443325_jbc.M112.443325-1.pdf [file supp_M112.443325_jbc.M112.443325-1.pdf]

**Supplemental Table S1. Oligonucleotide primers used in this study**

| Name             | Target gene (GenBank Accession Number) | Sequence                                                                   | Purpose                                 |
|------------------|----------------------------------------|----------------------------------------------------------------------------|-----------------------------------------|
| hAE1p17          | Human AE1 (NM 00342)                   | 5'-AAGCTTATGGAGGAGCTGCAGGATGAT-3'                                          | Creation of hAE1                        |
| hAE1p2Sall       | Human AE1                              | 5'-GTCGACTCACACAGGCAATGCCACTTCG-3'                                         |                                         |
| hAE1pdCt11sal1   | Human AE1                              | 5'-GTCGAGCTATTCATCTCAACCTTCTC-3'                                           | Creation of hAE1Δ11                     |
| bAE1EcoRVp1      | Bovine AE1 (NM101836)                  | 5'-GACTGGTGGTGTATATCCGGC-3'                                                | Creation of hAE1/b[1-403]               |
| bAE1EcoRVp2      | Bovine AE1                             | 5'-GCGCCGGATATCACGCCACAG-3'                                                | Creation of bAE1/h[1-385]               |
| b75RsacI         | Bovine AE1                             | 5'-ATCACGAGCTCCCGCAGCTGCAC-3'                                              | Creation of hAE1/b[1-75]                |
| h65FscI          | Human AE1                              | 5'-GCAGGAGCTCGTGTGGACGAAAAG-3'                                             |                                         |
| b18FXbaI         | Human AE1                              | 5'-GGAGAATCTAGAGCAGGAGGAATATG-3'                                           | Creation of hAE1/b[1-17]                |
| h18RXbaI         | Human AE1                              | 5'-TCCTGCTCTAGATTCTCTCCATC-3'                                              |                                         |
| b55REcoRV        | Bovine AE1                             | 5'-TGTGGATATCTGTGTCTGTACAGTGGTTG-3'                                        | Creation of hAE1/b[17-55]               |
| h46FEcoRV        | Human AE1                              | 5'-CACAGATATCCACACACCACATCACACCCGG-3'                                      |                                         |
| b37REcoRV        | Bovine AE1                             | 5'-AATGATATCACCTTCTGCCTTCCATTGG-3'                                         | Creation of hAE1/b[17-37]               |
| h39FEcoRV        | Human AE1                              | 5'-TCACGATATCGAGGCAACAGCCACAGAC-3'                                         |                                         |
| b37FEcoRV        | Bovine AE1                             | 5'-GATATCATTCAGGAAGAGGAGGCAG-3'                                            | Creation of bAE1/h[18-39]               |
| h39REcoRV        | Human AE1                              | 5'-CTCGATATCGTGTGAGCTGCCGGCT-3'                                            |                                         |
| bAE1H23PXbaI     | Bovine AE1                             | 5'-ACTCTAGAGCAAAAGGAATATGAAGACCCTGATTCCGTCCAGTATCCCA-3'                    | Creation of hAE1/b[23-37]               |
| b17FXbaI         | Bovine AE1                             | 5'-AGACTTAGGAGCAAAAGGAATATGAAGACC-3'                                       | Creation of hAE1/b[25-29]               |
| hAE1-AEGEcoRV    | Human AE1                              | 5'-ATGATATCACCTTCTGCCTCCTCCATCTGGGAC-3'                                    | Creation of hAE1/b[33-35]               |
| bAE1S25,27AmuF   | Bovine AE1                             | 5'-GAAGACCATGATGCCGTCGCTATCCCAATG-3'                                       | Mutation of S25A/S27A                   |
| beAE1spelsitep5  | Bovine AE1                             | 5'-TGCAGCTGCGGAACTAGTAATGGATGAAAAGAACC-3'                                  | Insertion of <i>Spe I</i> site in bAE1  |
| beAE1V26Ap1      | Bovine AE1                             | 5'-AAGACCATGATTCGCCGAGTATCCCAATGGA-3'                                      | Mutation of V26A in bAE1                |
| beAE1I28Ap1      | Bovine AE1                             | 5'-TCCGTCAGTGCCTCAATGGAAGAGGCAGAA-3'                                       | Mutation of I28A in bAE1                |
| beAE1P29Ap1      | Bovine AE1                             | 5'-TATCGCAATGGAAGAGGCAGAAAGGTGACAC-3'                                      | Mutation of P29A in bAE1                |
| beAE1M30Ap1      | Bovine AE1                             | 5'-CCATGATCCGTCAGTATCCAGCAGAAGA-3'                                         | Mutation of M30A in bAE1                |
| beAE1V26Lp1      | Bovine AE1                             | 5'-GAAGACCATGATTCCTCAGTATCCCAATGG-3'                                       | Mutation of V26L in bAE1                |
| beAE1V26Fp1      | Bovine AE1                             | 5'-AGTATCCCAATGGAAGAGGCAGAAAGGTGA-3'                                       | Mutation of V26F in bAE1                |
| beAE1V26Fp2      | Bovine AE1                             | 5'-TCCATTGGGATACGAAAGAAATCATGGT-3'                                         |                                         |
| beAE1I28Lp1      | Bovine AE1                             | 5'-GTCAGTTTGCCAATGGAAGAGGCAGAAAGG-3'                                       | Mutation of I28L in bAE1                |
| beAE1M30Lp1      | Bovine AE1                             | 5'-CCATGATCCGTCAGTATCCCACTCGAAGA-3'                                        | Mutation of M30L in bAE1                |
| beAE1SVSPIMp1    | Bovine AE1                             | 5'-CATGATCCGTCAGTCAATCATGGAAGA-3'                                          | Mutation of I28P/P29I in bAE1           |
| heAE1spelsitep5  | Human AE1                              | 5'-TGTGGAGTGCAGGAACTAGTAATGGACGAAAAGAACC-3'                                | Insertion of <i>Spe I</i> site in hAE1  |
| heAE1P27Vp2      | Human AE1                              | 5'-TCCTCCATCTGGGACTCGACGATGCTGGG-3'                                        | Mutation of P27V in hAE1Δ11             |
| heAE1S29Ip1      | Human AE1                              | 5'-CCGAGATCCAGATGGAGGAGCCGGCAGCTC-3'                                       | Mutation of S29I in hAE1Δ11             |
| heAE1P27VS29Ip1  | Human AE1                              | 5'-GACATCGTGTGAGTCCAGATGGAGGAGCCGG-3'                                      | Mutation of P27V/S29I in hAE1Δ11        |
| Ly49Ep1          | Mouse Ly49E (NM 008463)                | 5'-AACATACTTCATGAATCCACGATGAGTG-3'                                         | Cloning of Ly49E                        |
| Ly49Ep4          | Mouse Ly49E                            | 5'-GTCGACACAGGGAATGATCCAGTTTC-3'                                           |                                         |
| Ly49Ep5          | Mouse Ly49E                            | 5'-ACCCACTAGTCTCACTGTGAGATCGCTT-3'                                         | Insertion of <i>Spe I</i> site in Ly49E |
| beAE1/NtLy49Ep14 | Bovine AE1                             | 5'-ACGCACTAGTCCCGCAAGAGCTT-3'                                              | Creation of bN[1-37]Ly                  |
| heAE1NtLy49Ep10  | Human AE1                              | 5'-ATATCACGCACTAGTCCCGCAAGAGCT-3'                                          | Creation of hN[1-39]Ly                  |
| Sar1Ap1          | Human Sar1 (NM 001142648)              | 5'-GAATTCGCCGCCATGCTTTCATCTTTGAG-3'                                        | Creation of Sar1-myc                    |
| Sar1Ap2          | Human Sar1                             | 5'-CTCGAGTACAGTCTCTCTGAGATCAGCTTCTGCATTGATGCATGTCAATATACTGGGAGAGCCAGCGG-3' |                                         |
| Sar1H79Gp1       | Human Sar1                             | 5'-GTGGGGCGGAGCAAGCAGCTCGCGTTTG-3'                                         | Creation of Sar1H79G                    |
| Halotagp1        | pHT2 Vector                            | 5'-GTCGACATGGGATCCGAAATCCGTACAGGC-3'                                       | Cloning of Halo <sup>TM</sup> -tag      |
| Halotagp2        | pHT2 Vector                            | 5'-GCGGCCGCTTAGCCGGCCAGCCCGGGG-3'                                          |                                         |
| bN1-37p1         | Bovine AE1                             | 5'-CCCGGGTGAATTCATGGGGATCCGGAGG-3'                                         | Creation of bN[1-37]-Halo               |
| bN1-37p2         | Bovine AE1                             | 5'-GTCGACTGTGCACCTTCTGCCTTTC-3'                                            |                                         |
| hN1-39p1         | Human AE1                              | 5'-GGATCCGAATTCATGGAGGAGCTGCAGG-3'                                         | Creation of hN[1-39]-Halo               |
| hN1-39p2         | Human AE1                              | 5'-GTCGACTGTGTCGTGAGCTGCCGGC-3'                                            |                                         |
| Sec24Ap1         | Human Sec24A (NM 021982)               | 5'-CTCGAGATGTCCAGCCGGAATACCCGGCC-3'                                        | Cloning of Sec24A                       |
| Sec24Ap2         | Human Sec24A                           | 5'-GCGGCCGCTATTATTCACCTTGTGCTG-3'                                          |                                         |
| Sec24Bp1         | Human Sec24B (NM 006323)               | 5'-CTCGAGATGCAGGTTCATCTGGATATGG-3'                                         | Cloning of Sec24B                       |
| Sec24Bp2         | Human Sec24B                           | 5'-GCGGCCGCTACTTACAAATCTGTGCTG-3'                                          |                                         |
| Sec24Cp1         | Human Sec24C (NM 004922)               | 5'-CTCGAGATGAACGTCAACCAGTCAGTTCC-3'                                        | Cloning of Sec24C                       |
| Sec24Cp2         | Human Sec24C                           | 5'-GCGGCCGCTAGCTCAGTAGCTGCCAATC-3'                                         |                                         |
| Sec24Dp1         | Human Sec24D (NM 014822)               | 5'-CTCGAGATGAGTCAACAGATGACGTGGC-3'                                         | Cloning of Sec24D                       |
| Sec24Dp2         | Human Sec24D                           | 5'-GCGGCCGCTAATTAAGCAGCTGACAGATC-3'                                        |                                         |
| Sec24C-AAAp1     | Human Sec24C                           | 5'-GCGGCCGCTCCTGAGTGCATGAAGTACTC-3'                                        | Creation of Sec24C-AAA                  |
| mAE1p1           | Mouse AE1 (NM 11403)                   | 5'-GTCGACATGGGGGACATGCGGGACCACG-3'                                         | Creation of mouse AE1Δ11                |
| mAE1p2           | Mouse AE1                              | 5'-GAATCCCATCTTAGCCATCTCTCTCTC-3'                                          |                                         |
| cAE1p1           | Canine AE1 (AB242566)                  | 5'-CTCGACATGGACAACCAGGACAGCACC-3'                                          | Creation of canine AE1Δ11               |
| cAE1p2           | Canine AE1                             | 5'-GTCGACTCAACCTTCTCTTCATGAAAG-3'                                          |                                         |
| eAE1p1           | Equine AE1 (AB242566)                  | 5'-GTCGACTGGATGATTCCTCCAGGAGAAT-3'                                         | Creation of equine AE1Δ11               |
| eAE1p2           | Equine AE1                             | 5'-GTCGACTTAACCTTCTCTCATCAAAAG-3'                                          |                                         |
| cAE1/Ly49Ep1     | Mouse AE1                              | 5'-CAGCCACCATGGACAACCAGGACAGCACC-3'                                        | Creation of mN[1-49]Ly                  |
| cAE1/Ly49Ep2     | Mouse AE1                              | 5'-CACTAGTGTGGGGTAAGCTATGGCTCCTC-3'                                        |                                         |
| eAE1/Ly49Ep1     | Canine AE1                             | 5'-CAGCCACCATGGATGATTCCTCCAGGAGAATC-3'                                     | Creation of cN[1-46]Ly                  |
| eAE1/Ly49Ep2     | Canine AE1                             | 5'-CACTAGACTGGGCCTTCAATAATCCTCC-3'                                         |                                         |
| mAE1/Ly49Ep1     | Equine AE1                             | 5'-CAGCCACCATGGGGGACATGCGGGACCACG-3'                                       | Creation of eN[1-41]Ly                  |
| mAE1/Ly49Ep2     | Equine AE1                             | 5'-CACTAGTGTGGGAAGAGCTTCTGGGTC-3'                                          |                                         |
| VSV-Gp1          | pMD2.G                                 | 5'-GAATTCGCCGCCATGAAGTGCCTTTTGTAC-3'                                       | Creation of VSV-G-GFP                   |
| VSV-Gp2          | pMD2.G                                 | 5'-GTCGACCTTCCAAAGTCGGTTCATCTC-3'                                          |                                         |
