# Supplementary material
Source: PubMed Central journal article supplement (PMC3689993)
Supplement: supp_M112.443325_jbc.M112.443325-2.pdf [file supp_M112.443325_jbc.M112.443325-2.pdf]

**Supplemental Table 2. Summary of MS/MS analysis of the polypeptides that specifically bound to bN[1-37]-Halo**

| Polypeptides in Fig. 7A | Protein identified               | IPI accession number | Theoretical molecular mass (kDa) | Number of matched peptides* | Sequence of matched polypeptides <sup>†</sup> | Sequence coverage (%) <sup>§</sup> |
|-------------------------|----------------------------------|----------------------|----------------------------------|-----------------------------|-----------------------------------------------|------------------------------------|
| 120 kDa                 | Protein transport protein Sec24C | IPI00024661.5        | 118.2                            | 6                           | SPVESTTEPPAVR                                 | 4.38                               |
|                         |                                  |                      |                                  | 1                           | GTEPFVTGVR                                    |                                    |
|                         |                                  |                      |                                  | 3                           | SDVLQPGAEVTTDDR                               |                                    |
|                         |                                  |                      |                                  | 3                           | EGGAEESAIR                                    |                                    |
| 85 kDa                  | Protein transport protein Sec23A | IPI00017375.2        | 86.1                             | 10                          | AVLNPLCQVDYR                                  | 4.58                               |
|                         |                                  |                      |                                  | 1                           | AETEEGPDVLR                                   |                                    |
|                         |                                  |                      |                                  | 1                           | GPQVQQPPPSNR                                  |                                    |

\*Number of tryptic peptides with masses that matched those expected for the identified protein.

<sup>†</sup>The amino acid sequences identified by MS/MS.

<sup>§</sup>The percentage of amino acid sequences covered by the matched peptides.
